# Supplementary material for: Functional Conservation of the Pre-Sensor One Beta-Finger Hairpin (PS1-hp) Structures in Mini-Chromosome Maintenance Proteins of Saccharomyces cerevisiae and Archaea
Source: PubMed Central journal article supplement (PMC4455780; doi:10.1534/g3.114.011668), 2014-05-23
Supplement: supp_g3.114.011668_FigureS1.pdf [file supp_g3.114.011668_FigureS1.pdf]

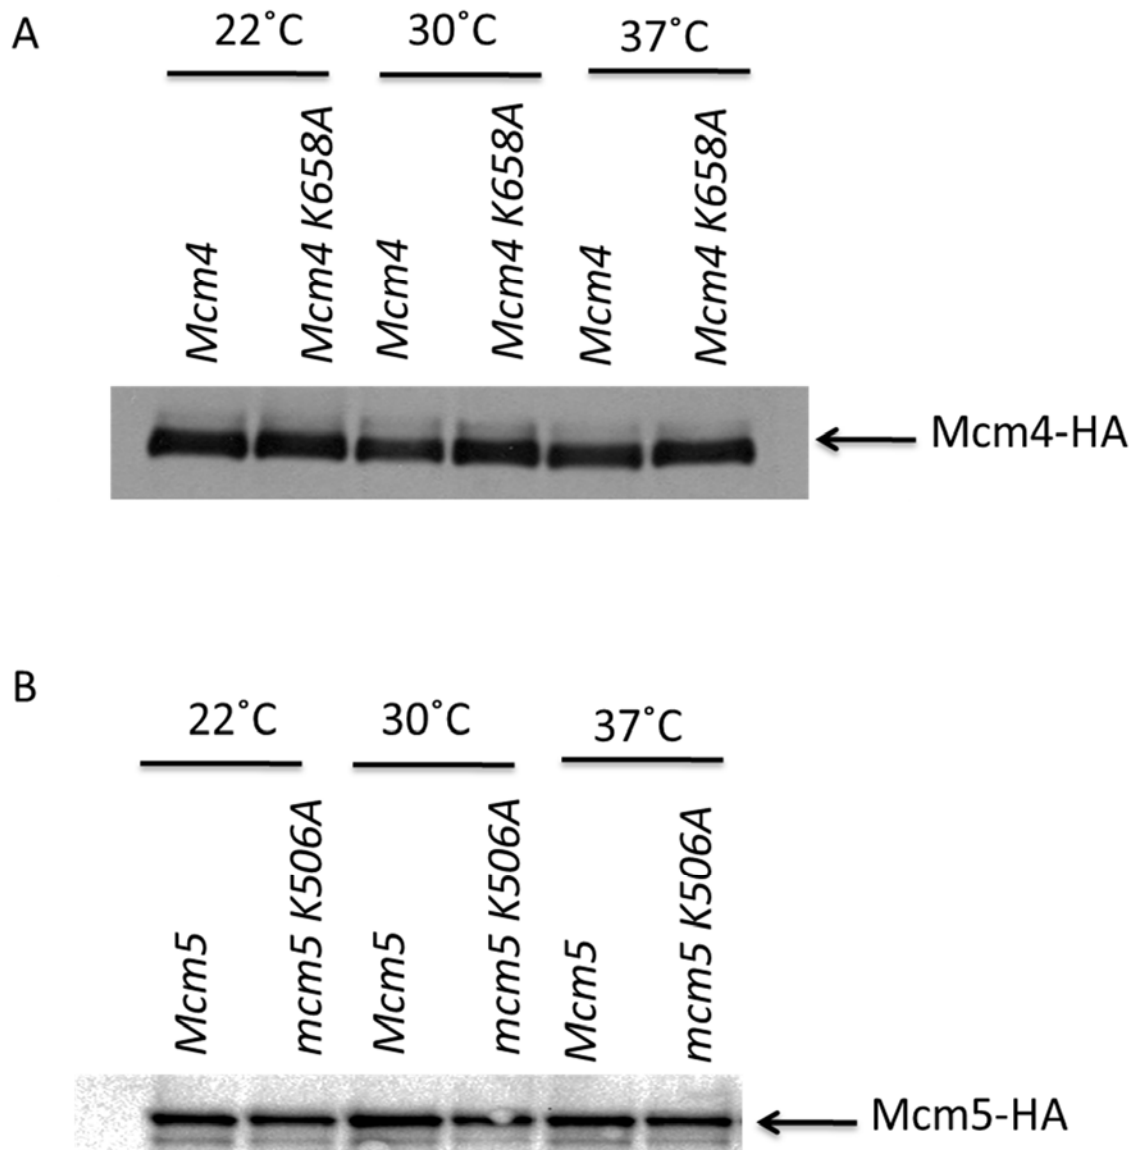

**Figure S1 Protein stability of PS1-hp mutants of Mcm5p and Mcm4p.** A) Western blot analysis of *mcm4p*-K658A-HA stability compared to *Mcm4p*-HA stability at 22°C, 30°C and 37°C. B) Western blot analysis of *mcm5p*-K506A-HA stability compared to *Mcm5p*-HA stability at 22°C, 30°C and 37°C.
