# Supplementary material for: Functional Conservation of the Pre-Sensor One Beta-Finger Hairpin (PS1-hp) Structures in Mini-Chromosome Maintenance Proteins of Saccharomyces cerevisiae and Archaea
Source: PubMed Central journal article supplement (PMC4455780; doi:10.1534/g3.114.011668), 2014-05-23
Supplement: supp_g3.114.011668_FigureS4.pdf [file supp_g3.114.011668_FigureS4.pdf]

# Synthetic Complete Growth Media (-/+ ) Indicated Nutrient/Drug

A

| Number of Tetrads Dissected | YEPD | -URA | -TRP | -LEU | + G418 | -URA + G418 | -URA -TRP | -URA -TRP + G418 |
|-----------------------------|------|------|------|------|--------|-------------|-----------|------------------|
| 91                          | 197  | 131  | 88   | 99   | 44     | 44          | 51        | 0 (22)           |

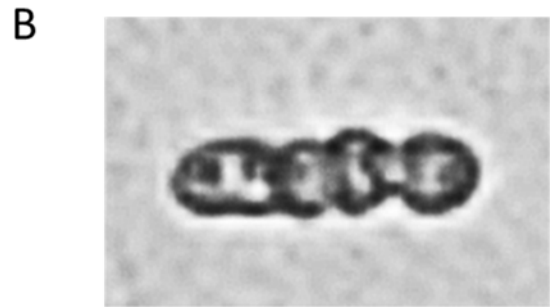

**Figure S4 Tetrad analysis of PS1-hp mutants and the terminal MCM phenotype of *mcm4 mcm5* PS1-hp double mutant spores.** A. CRY119 was mated to RSY1345 to form diploids, which were then sporulated. Tetrads were dissected and spores that were  $-Ura^+ G418R$ , which contain both the *mcm5::KanMX4* and *mcm5-HAT K658A::URA3* mutations, were tested for the presence of the *mcm4-HA K658A::TRP1* allele. As *mcm5* and *mcm4* are unlinked, we expected to find 50% (22/44)  $Trp^+$  colonies that carry the *mcm4* PS1-hp mutation. With *mcm5-HA K658A::URA3*, no  $Trp^+$  colonies were found ( $n=44$ ,  $p<0.005$ ). B. The terminal phenotype of the double *mcm4 mcm5* PS1-hp mutant is two large budded cells (magnification=400X).
